# Supplementary material for: A postsynthetic ion exchange method for tunable doping of hydroxyapatite nanocrystals
Source: Royal Society of Chemistry journal article supplement (doi:10.1039/c7ra10516a), 2017-01-01
Supplement: c7ra10516a1.pdf [file c7ra10516a1.pdf]

Electronic Supplementary Material (ESI) for RSC Advances.  
This journal is © The Royal Society of Chemistry 2017

SUPPLEMENTARY INFORMATION

**A Postsynthetic Ion Exchange Method for Tunable Doping of  
Hydroxyapatite Nanocrystals**

Gaoyu Chen,<sup>‡a,b</sup> Xiaoyan Zheng,<sup>‡a</sup> Chong Wang,<sup>b</sup> Junfeng Hui,<sup>a</sup> Xuexi Sheng,<sup>b</sup> Xiangxing Xu,<sup>\*b</sup>  
Jianchun Bao,<sup>b</sup> Weijun Xiu,<sup>c</sup> Lihui Yuwen<sup>\*c</sup> and Daidi Fan<sup>\*a</sup>

<sup>a</sup> Shaanxi Key Laboratory of Degradable Biomedical Materials, Shaanxi R&D Center of Biomaterials and Fermentation Engineering, School of Chemical and Engineering, Northwest University, Xi'an, 710069, P. R. China. E-mail: fandaidi@nwu.edu.cn

<sup>b</sup> Jiangsu Key Laboratory of Biofunctional Materials, School of Chemistry and Materials Science, Nanjing Normal University, Nanjing 210046, P. R. China. E-mail: xuxx@njnu.edu.cn

<sup>c</sup> Institute of Advanced Materials (IAM), School of Materials Science and Engineering and Key Laboratory for Organic Electronics & Information Displays (KLOEID), Nanjing University of Posts & Telecommunications, 9 Wenyuan Road, Nanjing 210023, P. R. China. E-mail: iamliyuwen@njupt.edu.cn

## FIGURES

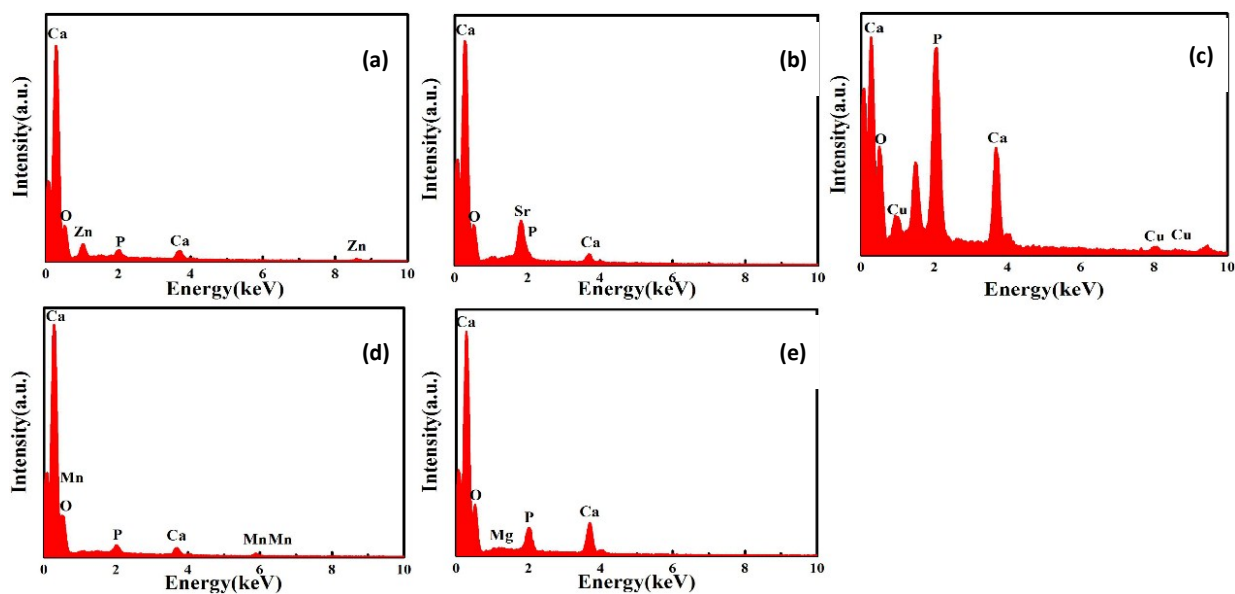

**Figure S1.** EDS spectra of the HAp nanocrystals doped with (a) Zn<sup>2+</sup>, (b) Sr<sup>2+</sup>, (c) Cu<sup>2+</sup>, (d) Mn<sup>2+</sup>, (e) Mg<sup>2+</sup>.

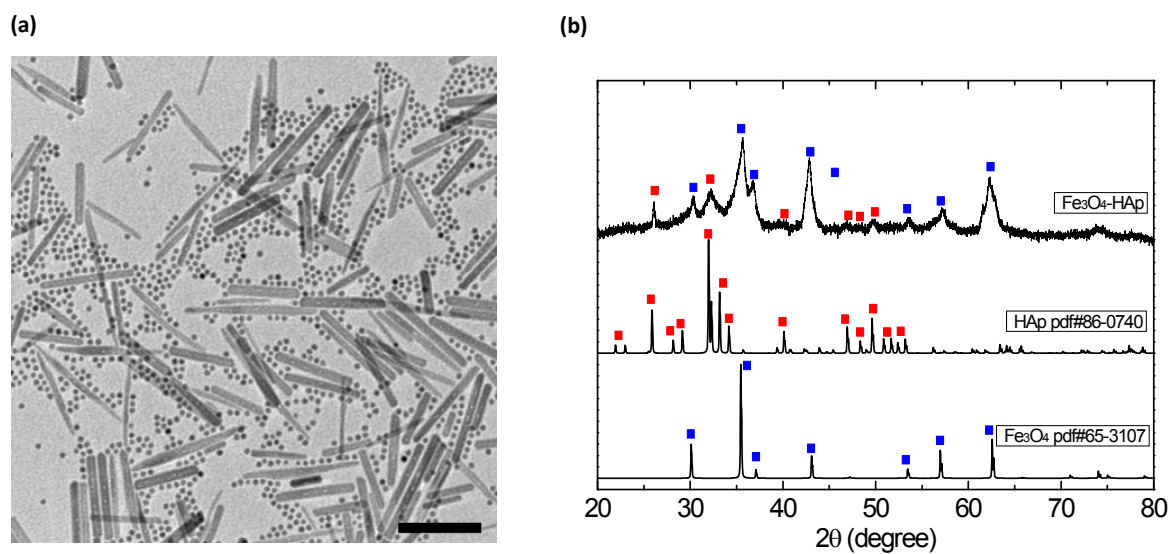

**Figure S2.** (a) TEM image of Fe<sub>3</sub>O<sub>4</sub>-HAp nanocrystals, prepared at 300 °C for the ion exchange. (b) XRD of the Fe<sub>3</sub>O<sub>4</sub>-HAp sample. ((a) scale bar: 100 nm)

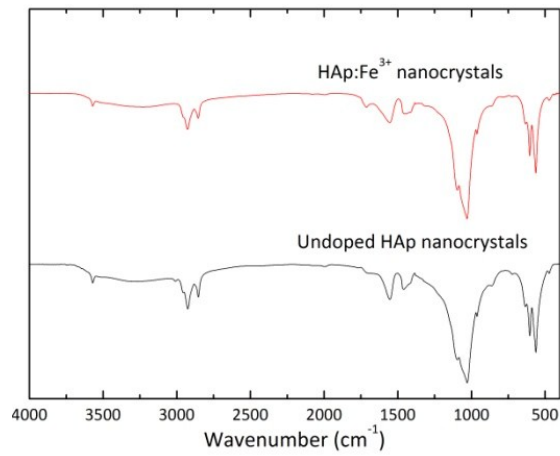

**Figure S3.** The FTIR spectra of the undoped and Fe<sup>3+</sup> doped (20.5%) HAp nanocrystals.

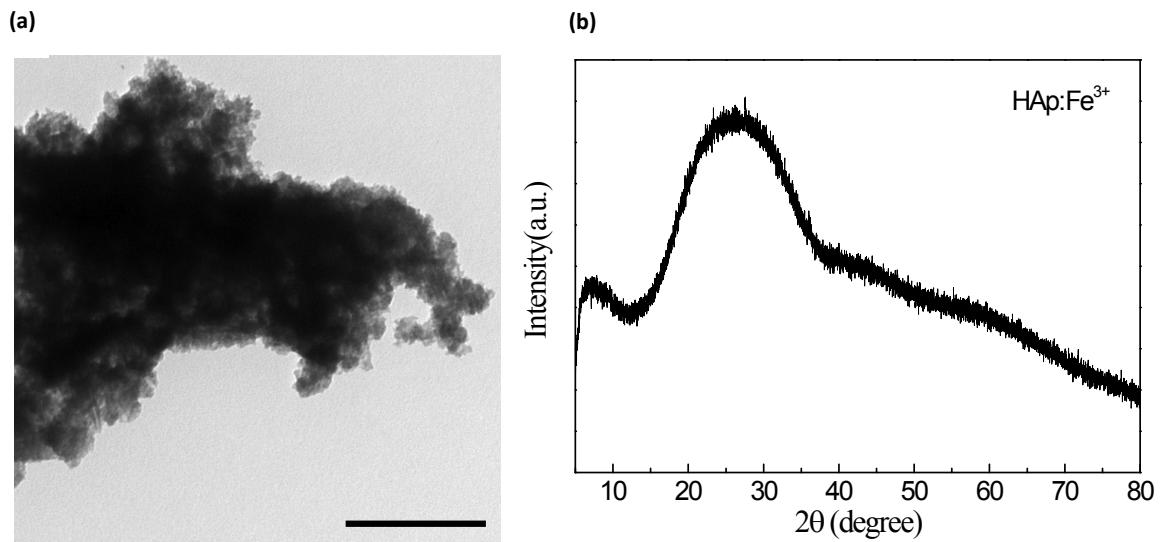

**Figure S4.** (a) TEM image of HAp nanocrystals ion exchanged with Fe(NO<sub>3</sub>)<sub>3</sub> aqueous solutions (the Fe(NO<sub>3</sub>)<sub>3</sub> concentration is 0.1 M). (b) The corresponding XRD spectrum indicates that the HAp crystal structure is destroyed, exhibiting a wide peak feature of amorphous phase. ((a) scale bar: 200 nm)

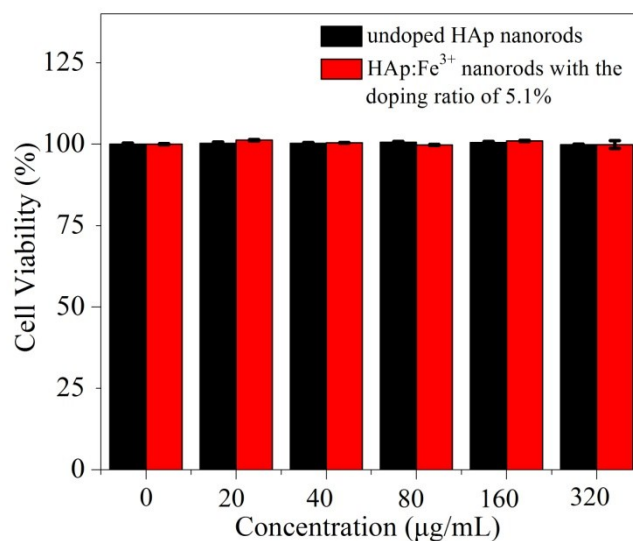

**Figure S5.** The cytotoxicity assay results of the human cervical carcinoma (HeLa) cells cultured for 24 h at 37 °C in media containing 0–320 µg/mL of HAp:Fe<sup>3+</sup> nanorods with the doping ratio of 5.1% (postsynthetic ion exchanged at 150 °C, see Fig 5b) and undoped HAp nanorods (Fig 5a) as a control experiment.

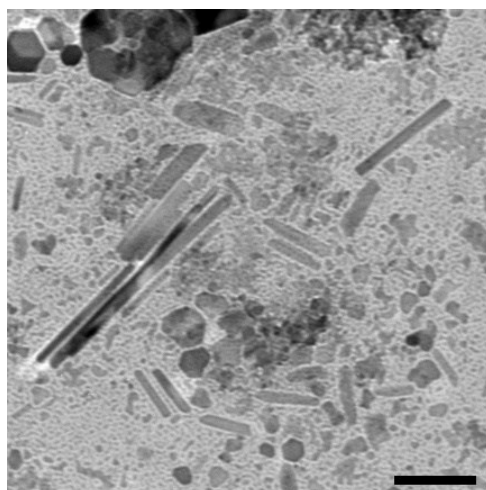

**Figure S6.** TEM image of the Fe<sup>3+</sup> doped HAp nanocrystals prepared by the co-nucleation doping. (scale bar: 100 nm)

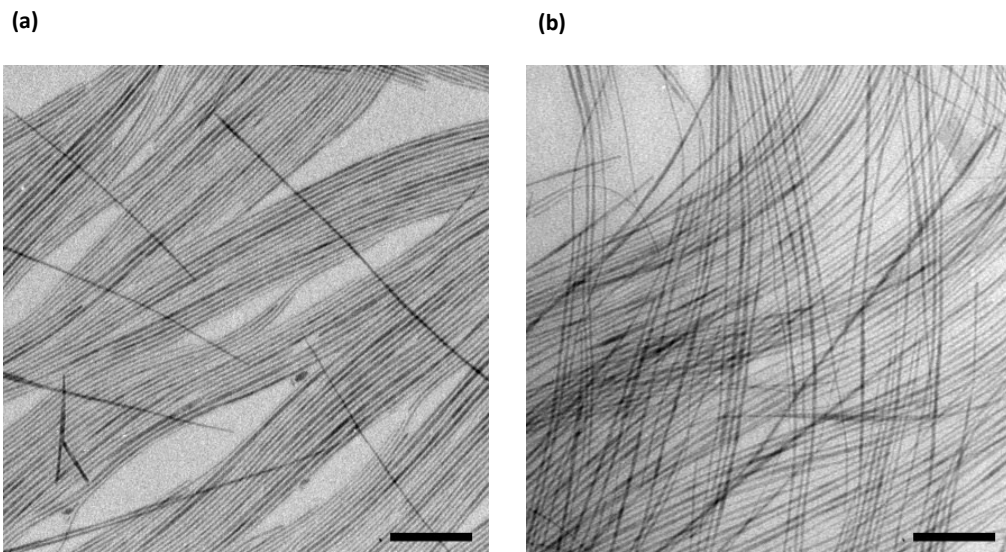

**Figure S7.** TEM images of (a) Ca-PO<sub>4</sub>-CO<sub>3</sub> (CHAp) nanowires and (b) CHAp:Fe<sup>3+</sup> nanowires with preserved morphology. (scale bar: 100 nm)

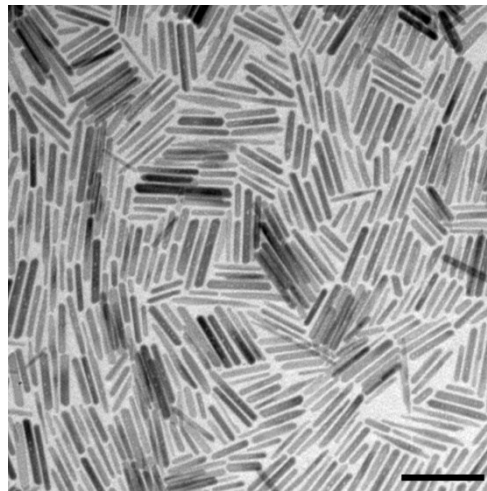

**Figure S8.** TEM image of bimetallic ions co-doping HAp:Zn<sup>2+</sup>,Cu<sup>2+</sup> nanorods. (scale bar: 100 nm)
